# Supplementary material for: BID links ferroptosis to mitochondrial cell death pathways
Source: PubMed Central journal article supplement — Redox Biol. 2017 Mar 9;12:558–70. doi: 10.1016/j.redox.2017.03.007 (PMC5382034; doi:10.1016/j.redox.2017.03.007), 2017-03-09
Supplement: mmc1.pdf [file mmc1.pdf]

**Supplemental figure 1: Ferrostatin-1 and BI-6c9 prevent oxytosis and ferroptosis in MEFs**

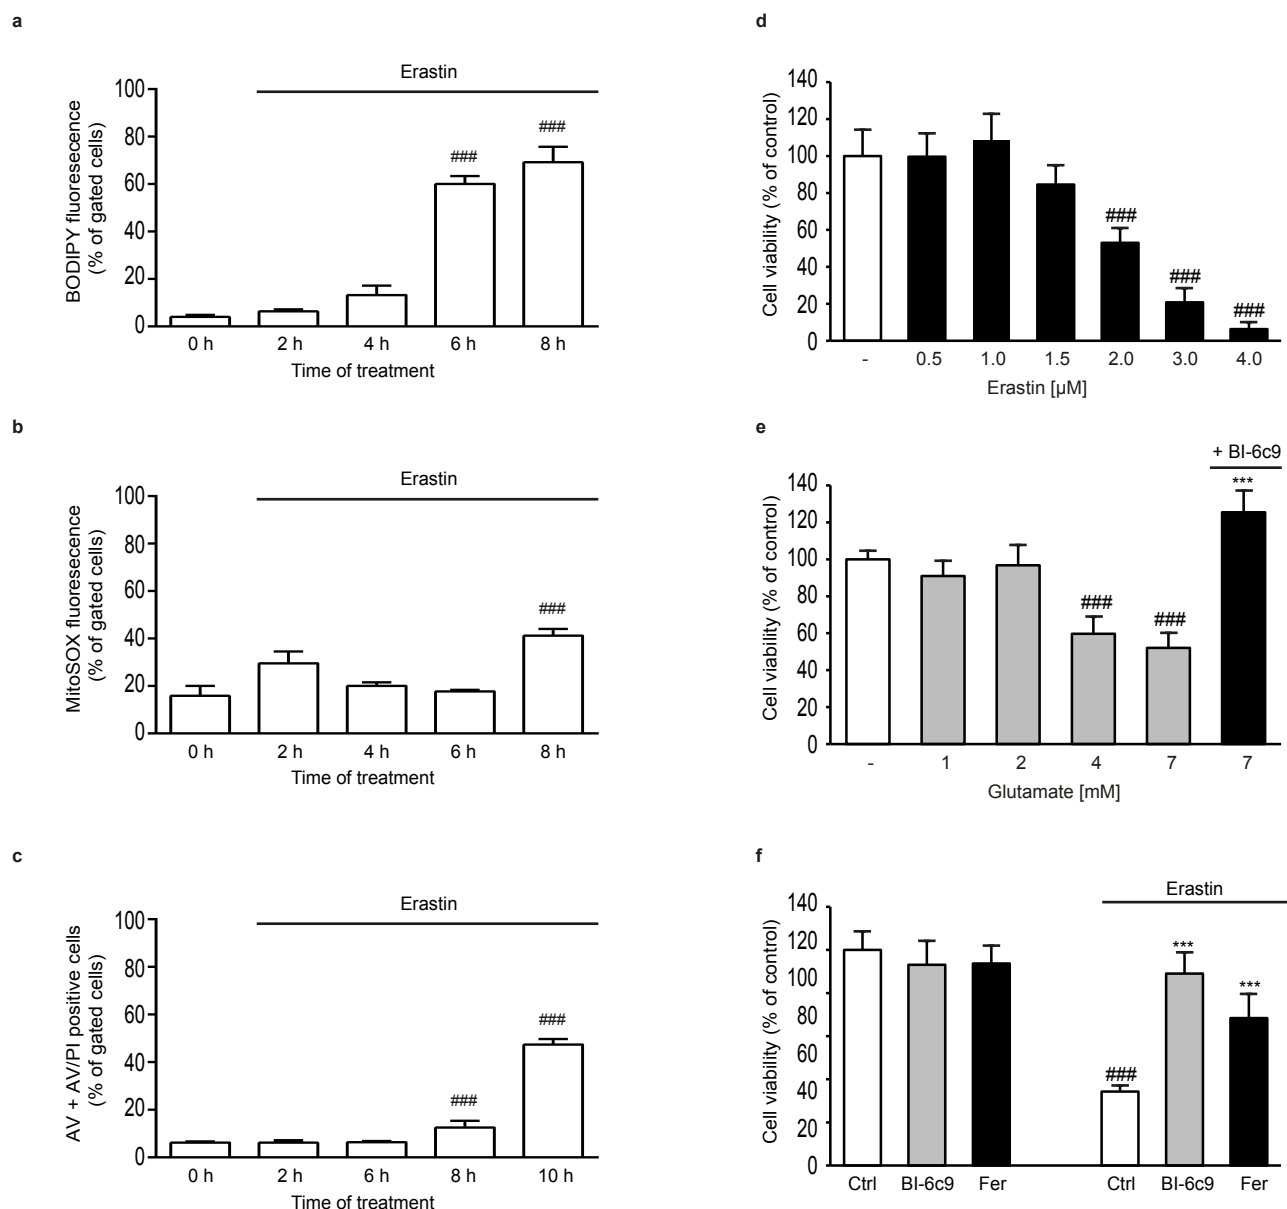

**Supplemental figure 1: Ferrostatin-1 and BI-6c9 prevent oxytosis and ferroptosis in MEFs.**

**a:** BODIPY staining and subsequent FACS analysis shows time-dependent increase in lipid peroxidation after erastin (1  $\mu$ M) treatment in MEF cells. **b:** MitoSOX staining and subsequent FACS analysis revealed time-dependent mitochondrial ROS formation after erastin (1  $\mu$ M) exposure in MEF cells. **c:** Annexin V/PI staining and subsequent FACS analysis showed time-dependent increase in Annexin V (Green fluorescence) and PI (Red fluorescence) positive cells after erastin (1  $\mu$ M) exposure in MEF cells. **d:** MTT assay depicts dose-dependent toxicity of erastin in MEFs (17 h). n=8. **e:** MTT assay shows dose-dependent toxicity of glutamate in MEFs (17 h), which is prevented by BI-6c9. n=8. **f:** MTT assay revealed protection of BI-6c9 (10  $\mu$ M) and ferrostatin-1 (2  $\mu$ M) against erastin (1  $\mu$ M, 16 h) toxicity (n=8). Data are given as mean + S.D. ###p<0.001 compared to untreated control; \*\*\*p<0.001 compared to erastin-/ glutamate-treated control (ANOVA, Scheffé's test).

## Supplemental figure 2: TMRE and ATP time courses

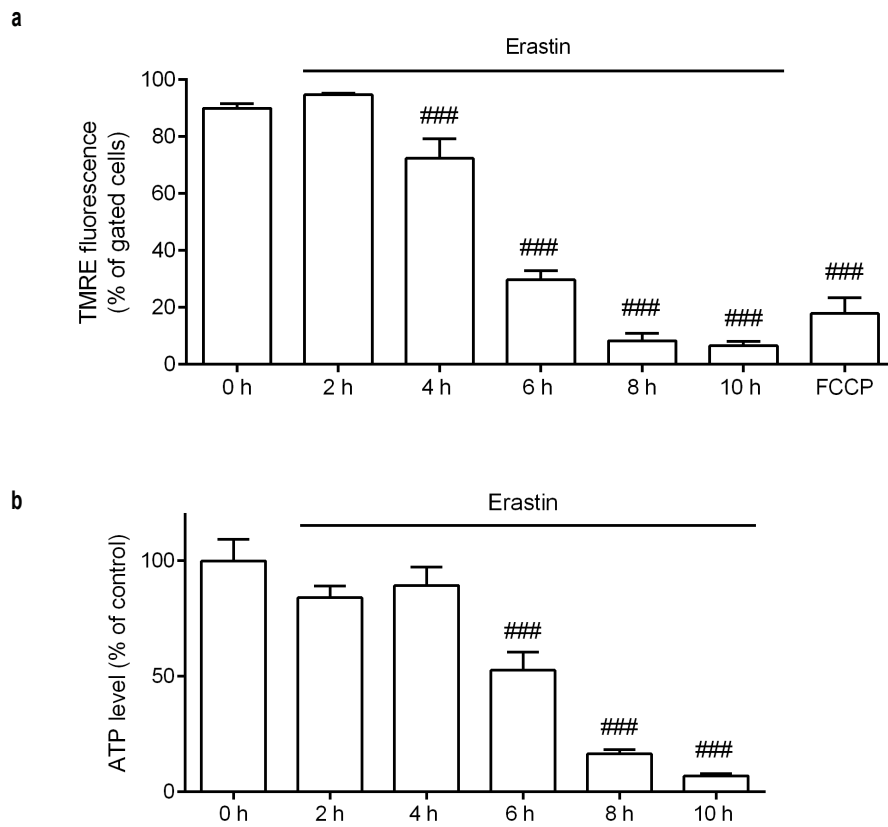

### Supplemental figure 2: TMRE and ATP time courses

**a:** TMRE staining and subsequent FACS analysis shows time-dependent loss of mitochondrial membrane potential after erastin (1  $\mu$ M) treatment in HT-22 cells. FCCP (50  $\mu$ M, 5 min) treatment is shown as a positive control. **b:** Measurement of ATP levels reveals a time-dependent loss of ATP production after erastin (1  $\mu$ M) treatment in HT-22 cells. Data are given as mean + S.D. ### $p$ <0.001 compared to untreated control, ANOVA, Scheffé's test.

**Supplemental figure 3: BI-6c9 prevents glutamate and erastin induced cell death**

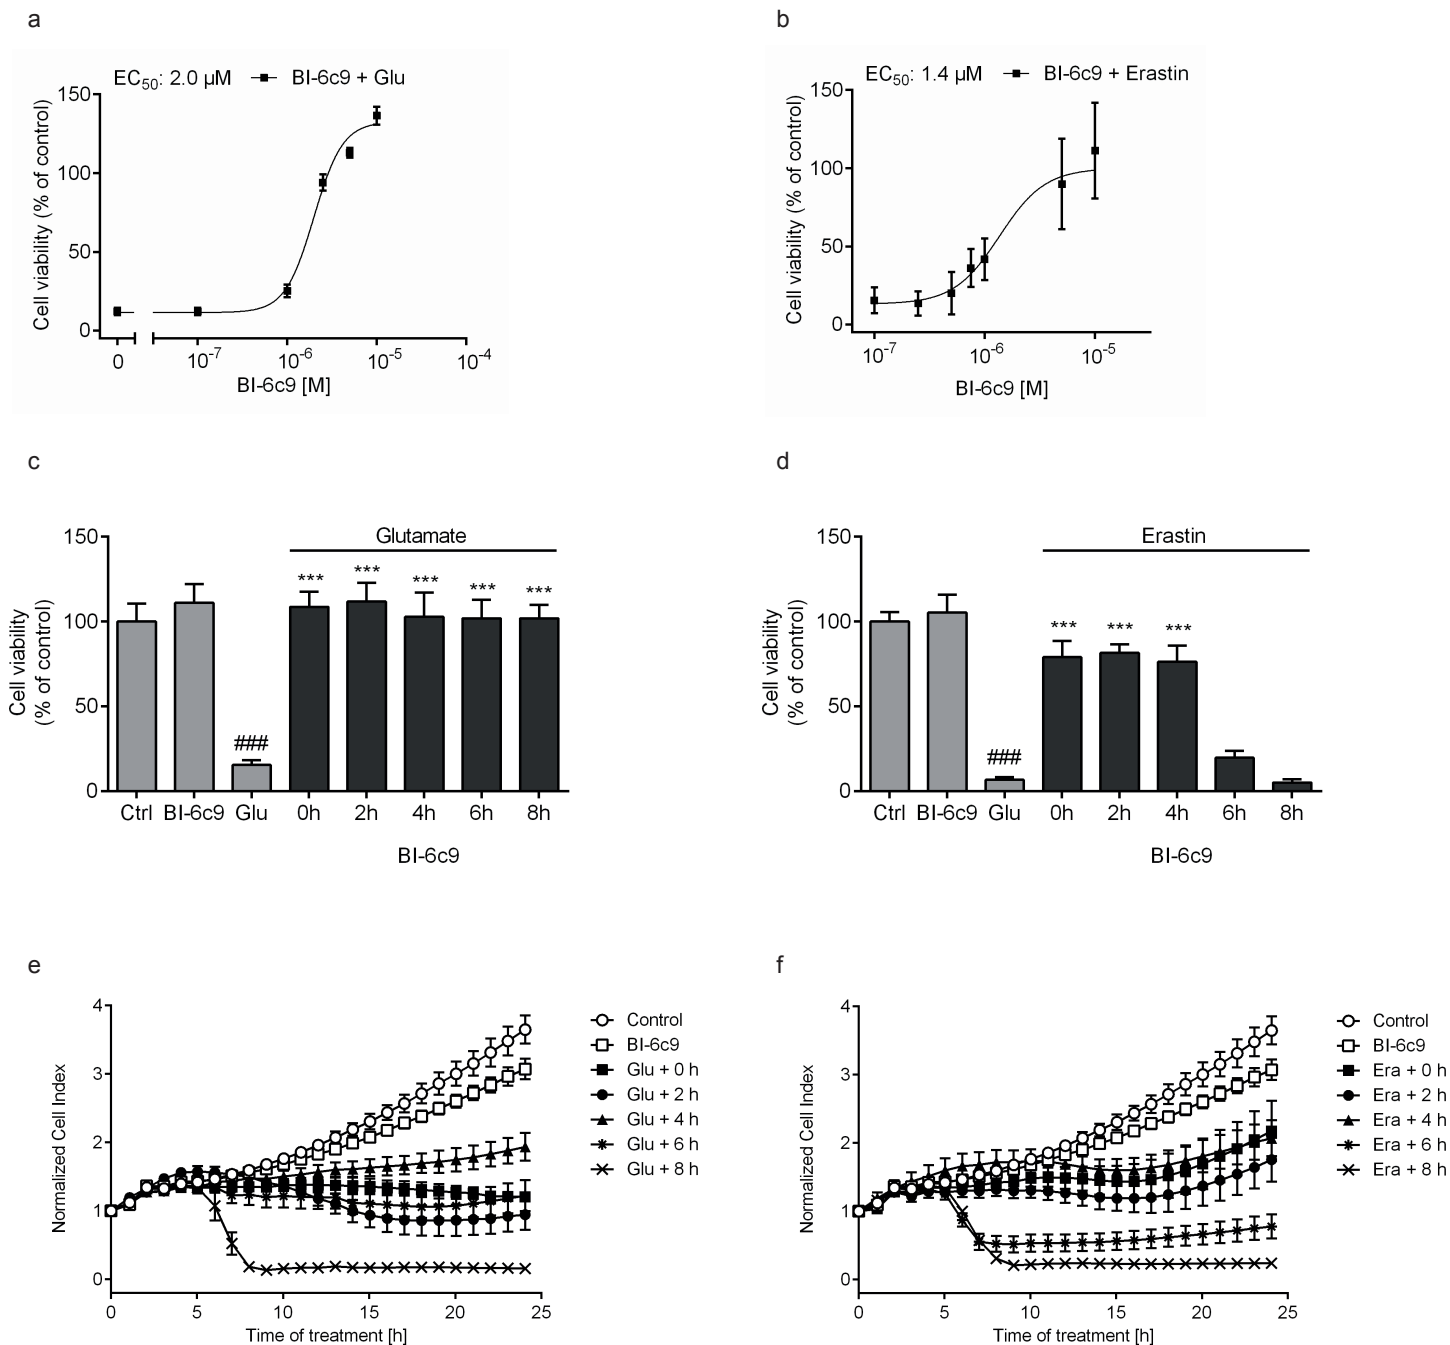

**Supplemental figure 3: BI-6c9 prevents glutamate and erastin induced cell death**

**a:** Concentration-response curve of BI-6c9 upon glutamate (3 mM, 14 h) treatment (EC<sub>50</sub> = 2.0 μM, pEC<sub>50</sub> = 5.70 ± 0.02, n=8). **b:** Concentration-response curve of BI-6c9 upon erastin (1.5 μM, 14 h) treatment. (EC<sub>50</sub> = 1.4 μM, pEC<sub>50</sub> = 5.87 ± 0.04, n=28). **c:** MTT assay revealed a protective effect of BI-6c9 (10 μM) until 8 hours after glutamate treatment (6 mM, 24 h) (n=8/treatment condition). **d:** MTT assay revealed a protective effect of BI-6c9 (10 μM) until 4 hours after erastin treatment (1 μM, 24 h) (n=8/treatment condition). **e:** Real-time impedance measurement with the Xcelligence system demonstrated a protective effect of BI-6c9 (10 μM) until 6 hours of glutamate treatment (10 mM). **f:** Real-time impedance measurement with the Xcelligence system demonstrated a protective effect of BI-6c9 (10 μM) until 4 hours of erastin treatment (1 μM). Data are given as mean + S.D. or ± S.D. ###p<0.001 compared to untreated control. \*\*\*p<0.001 compared to erastin-/ glutamate-treated control (ANOVA, Scheffé's test).

**Supplemental figure 4: Ferrostatin-1 and BI-6c9 fail to prevent H<sub>2</sub>O<sub>2</sub>-induced cell death and necroptosis**

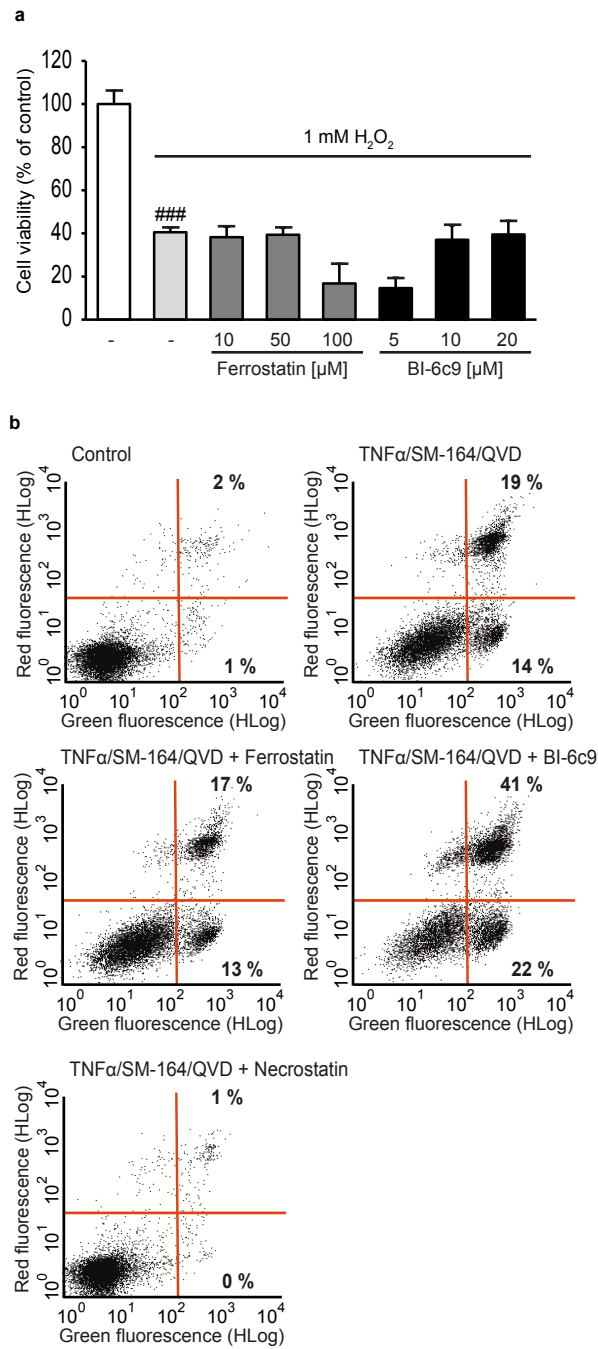

**Supplemental figure 4: Ferrostatin-1 and BI-6c9 fail to prevent H<sub>2</sub>O<sub>2</sub>-induced cell death and necroptosis.**

a: MTT assay shows toxicity of H<sub>2</sub>O<sub>2</sub> (1 mM, 16 h) in HT-22 cells which is not abolished by ferrostatin-1 or BI-6c9. n=8. b: Necroptosis induced by TNFα (100 ng/ml), SM-164 (50 nM) and QVD (10 μM) in HT-22 cells was analyzed by Annexin V/PI staining and subsequent FACS-analysis after 17 h of treatment. BI-6c9 (10 μM) and ferrostatin-1 (2 μM) fail to prevent necroptosis, while necrostatin fully abolishes cell death (representative FACS plots).

## Supplemental figure 5: Liproxstatin-1 prevents glutamate-induced oxytosis

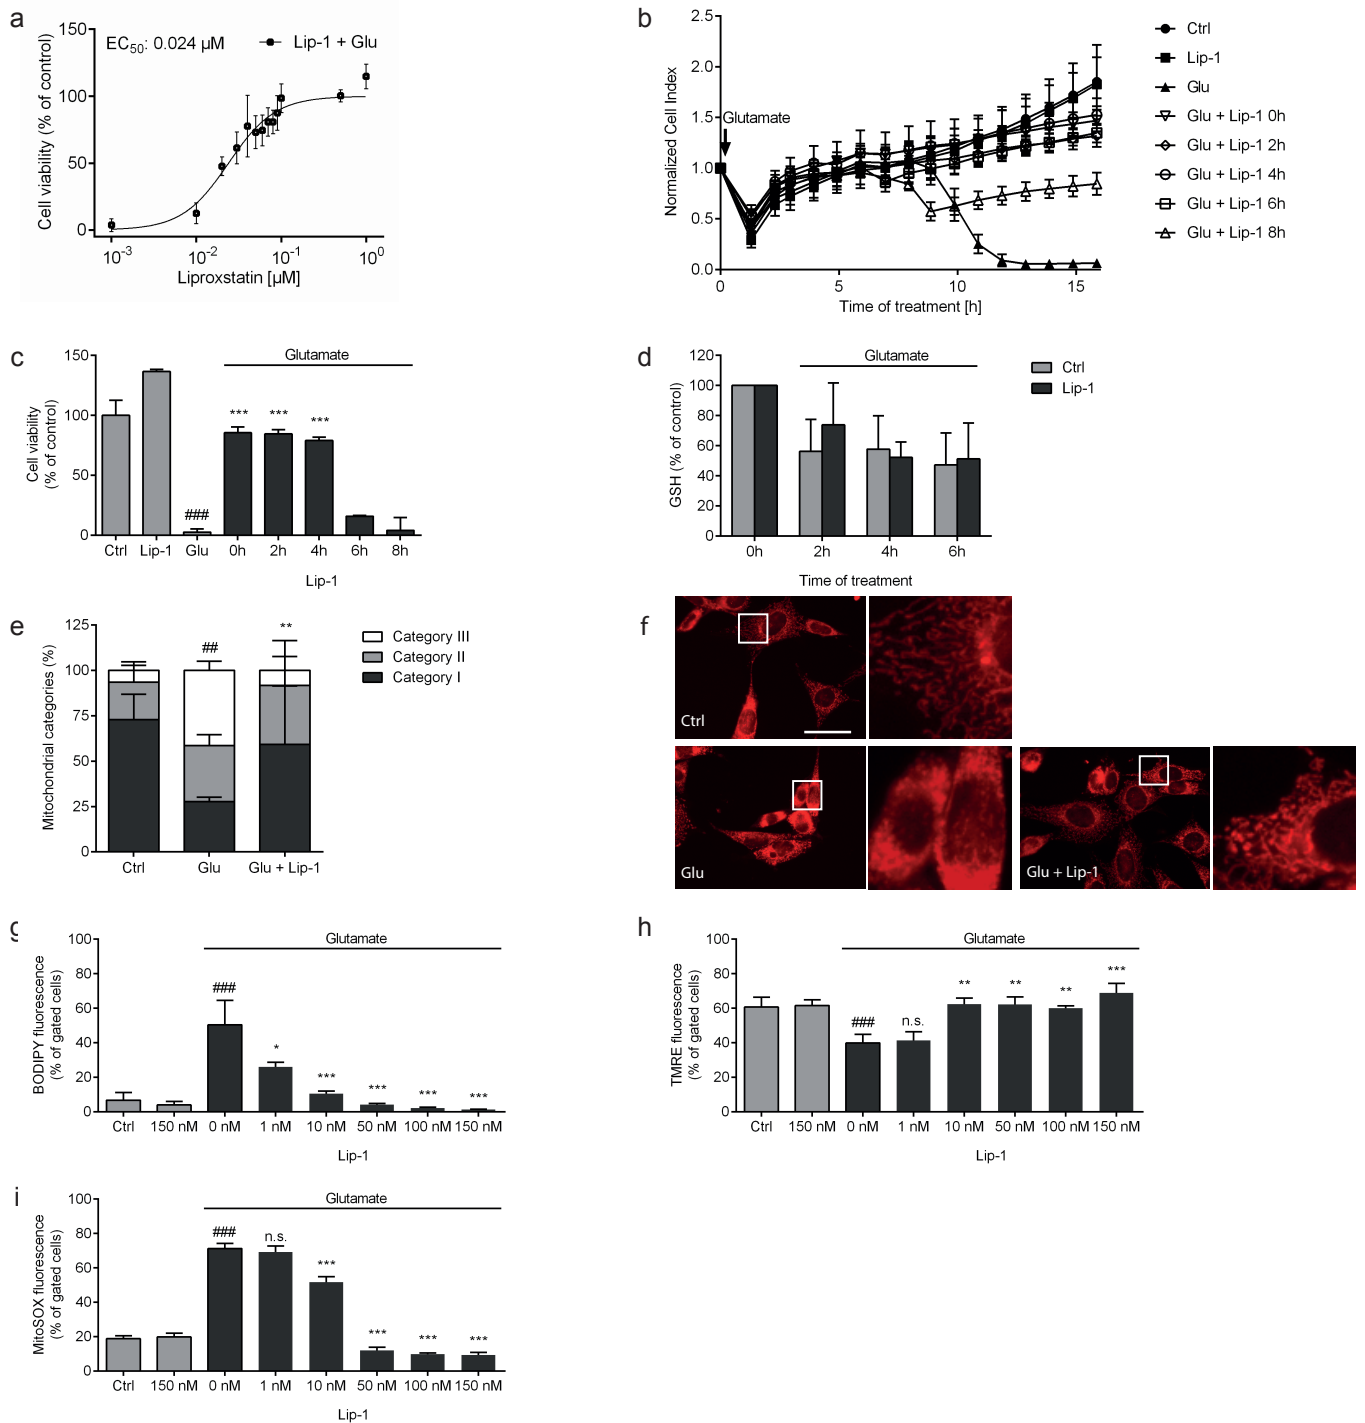

### Supplemental figure 5: Liproxstatin-1 prevents glutamate-induced oxytosis

**a:** Concentration-response curve of Liproxstatin-1 (Lip-1) upon glutamate (5 mM, 16-17 h) treatment. Cell viability data were fitted from 0 for glutamate-treated control to 100 for highest protection at 1  $\mu$ M Lip-1 (EC<sub>50</sub> = 0.024  $\mu$ M, pEC<sub>50</sub> = 7.62  $\pm$  0.04, n=3). **b:** Real-time impedance measurement revealed protection of Lip-1 (150 nM) against glutamate (6 mM) toxicity until 6-8 h post-treatment; (n=8/treatment condition). **c:** MTT confirmed protection of Lip-1 (150 nM) against glutamate (6 mM, 16-17 h) toxicity until 4-8 h post-treatment; (representative MTT assay; n=6/treatment condition). **d:** Measurement of glutathione (GSH) depicted rapid decrease of GSH after glutamate (6 mM) which could not be restored upon Lip-1 (150 nM) co-treatment; (n=4/treatment condition). **e:** Quantification of 500 cells counted blind to treatment (n=3) revealed Lip-1 dependent reduction of glutamate-induced (4 mM, 16 h) mitochondrial fission. **f:** Representative images (63x objective) showed mitochondrial morphology in the presence and absence of glutamate (4 mM, 16 h)  $\pm$  Lip-1 (150 nM). Scale bar 50  $\mu$ M. **g:** Glutamate treatment (8 mM, 8 h) increased lipid peroxide production (stained with BODIPY 581/591), which was blocked by co-treatment with concentrations of >10-50 nM Lip-1 (representative FACS measurement; n=3/treatment condition). **h:** Quantification of TMRE fluorescence showed that MMP was fully restored by >10 nM Lip-1 after glutamate exposure (8 mM, 16 h) (representative FACS measurement; n=3/treatment condition). **i:** Glutamate treatment (7 mM, 16 h) increased mitochondrial ROS production, which was blocked by co-treatment with concentrations of >10-50 nM Lip-1 (representative FACS measurement; n=3/treatment condition).

Data are given as mean  $\pm$  S.D. ###p<0.001 compared to untreated control; \*\*\*p<0.001 compared to glutamate-treated control (ANOVA, Scheffe's test).

## Supplemental figure 6: Liproxstatin-1 prevents erastin-induced ferroptosis

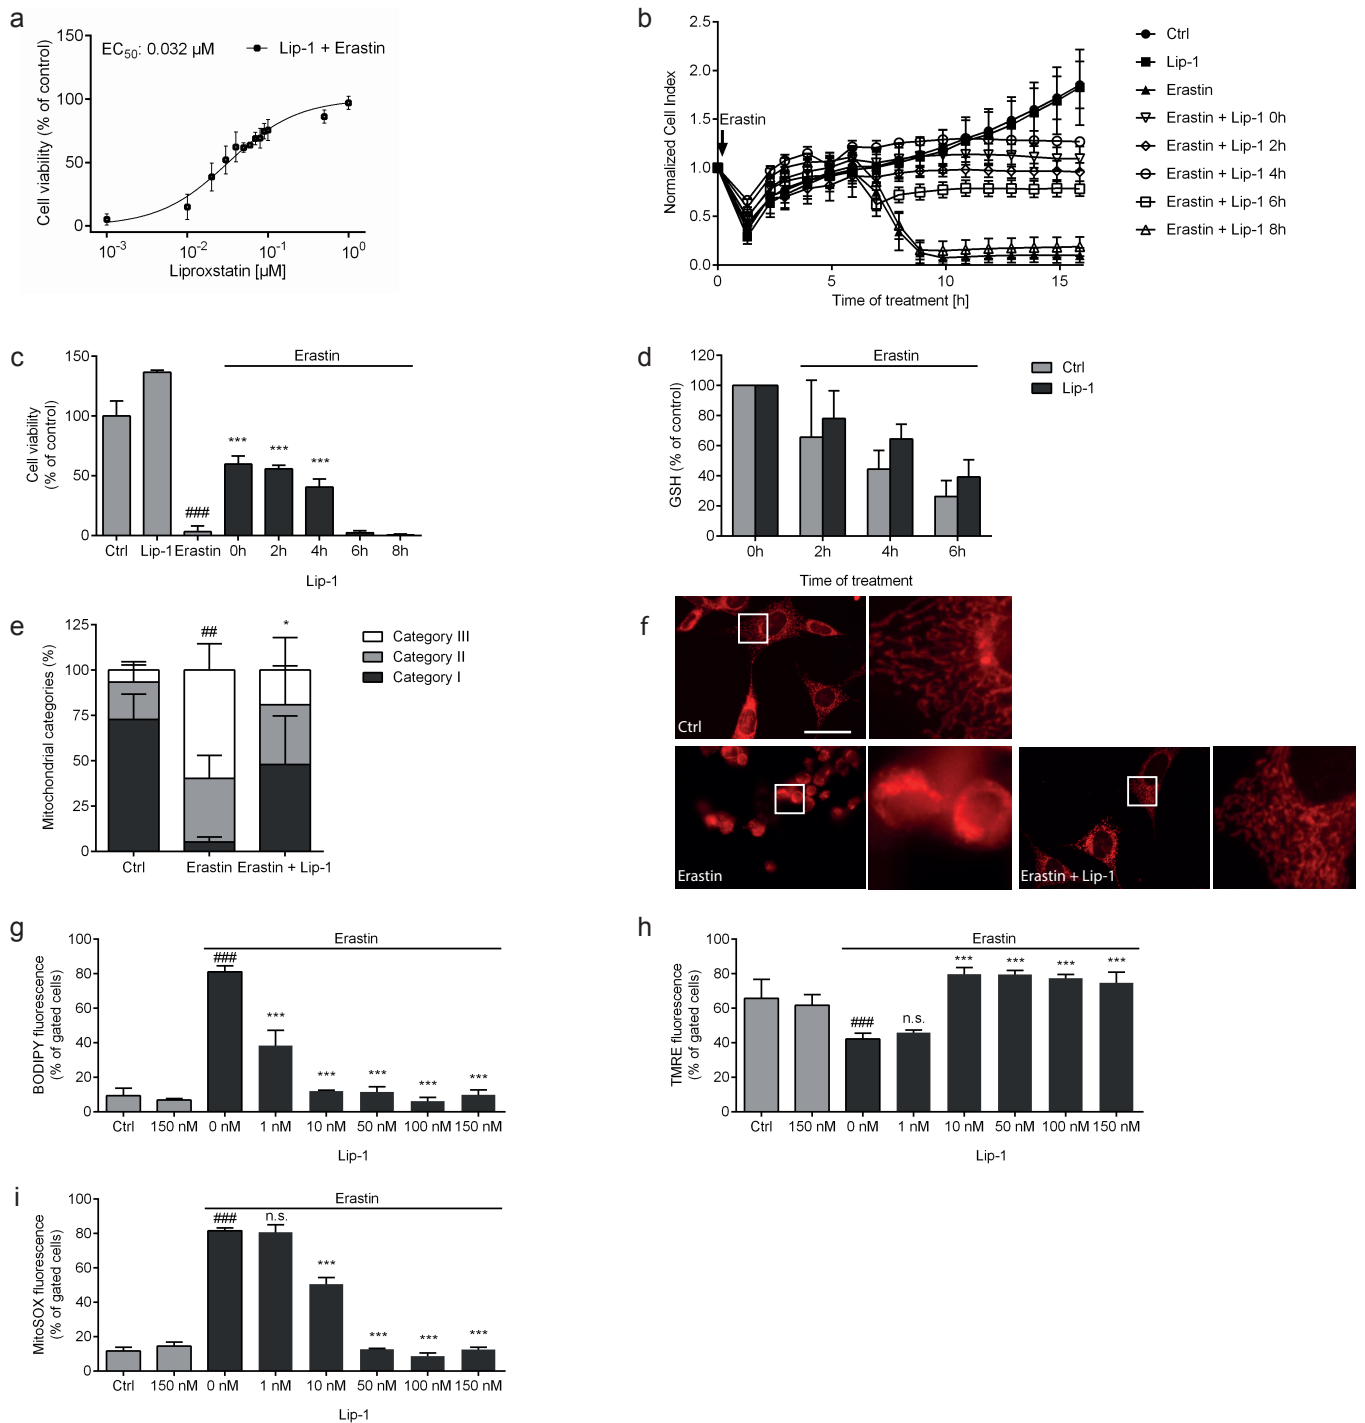

### Supplemental figure 6: Liproxstatin-1 prevents erastin-induced ferroptosis

**a:** Concentration-response curve of Liproxstatin-1 (Lip-1) upon erastin (1  $\mu$ M, 16-17 h) treatment. Cell viability data were fitted from 0 for erastin-treated control to 100 for highest protection at 1  $\mu$ M Lip-1 (EC<sub>50</sub> = 0.032  $\mu$ M, pEC<sub>50</sub> = 7.49  $\pm$  0.03, n=3). **b:** Real-time impedance measurement revealed protection of Lip-1 (150 nM) against erastin (1  $\mu$ M) toxicity until 4-6 h post-treatment; (n=8/treatment condition). **c:** MTT confirmed protection of Lip-1 (150 nM) against erastin (1  $\mu$ M, 16-17 h) toxicity until 4 h post-treatment; (representative MTT assay; n=6/treatment condition). **d:** Measurement of glutathione (GSH) depicted rapid decrease of GSH after erastin (1  $\mu$ M) which could not be restored upon Lip-1 (150 nM) co-treatment; (n=4/treatment condition). **e:** Quantification of 500 cells counted blind to treatment (n=3) revealed Lip-1 dependent reduction of erastin-induced (0.5 mM, 16 h) mitochondrial fission. **f:** Representative images (63x objective) showed mitochondrial morphology in the presence and absence of erastin (1  $\mu$ M, 16 h)  $\pm$  Lip-1 (150 nM). Scale bar 50  $\mu$ M. **g:** Erastin treatment (1  $\mu$ M, 8 h) increased lipid peroxide production (stained with BODIPY 581/591), which was blocked by co-treatment with concentrations of >1-10 nM Lip-1 (representative FACS measurement; n=3/treatment condition). **h:** Quantification of TMRE fluorescence showed that MMP was fully restored by >10 nM Lip-1 after erastin exposure (1  $\mu$ M, 16 h) (representative FACS measurement; n=3/treatment condition). **i:** Erastin treatment (1  $\mu$ M, 16 h) increased mitochondrial ROS production, which was blocked by co-treatment with concentrations of >10-50 nM Lip-1 (representative FACS measurement; n=3/treatment condition).

Data are given as mean  $\pm$  S.D. ###p<0.001 compared to untreated control; \*\*\*p<0.001 compared to glutamate-treated control (ANOVA, Scheffe's test).

**Supplemental figure 7: Quantification of Bid translocation upon glutamate and erastin exposure**

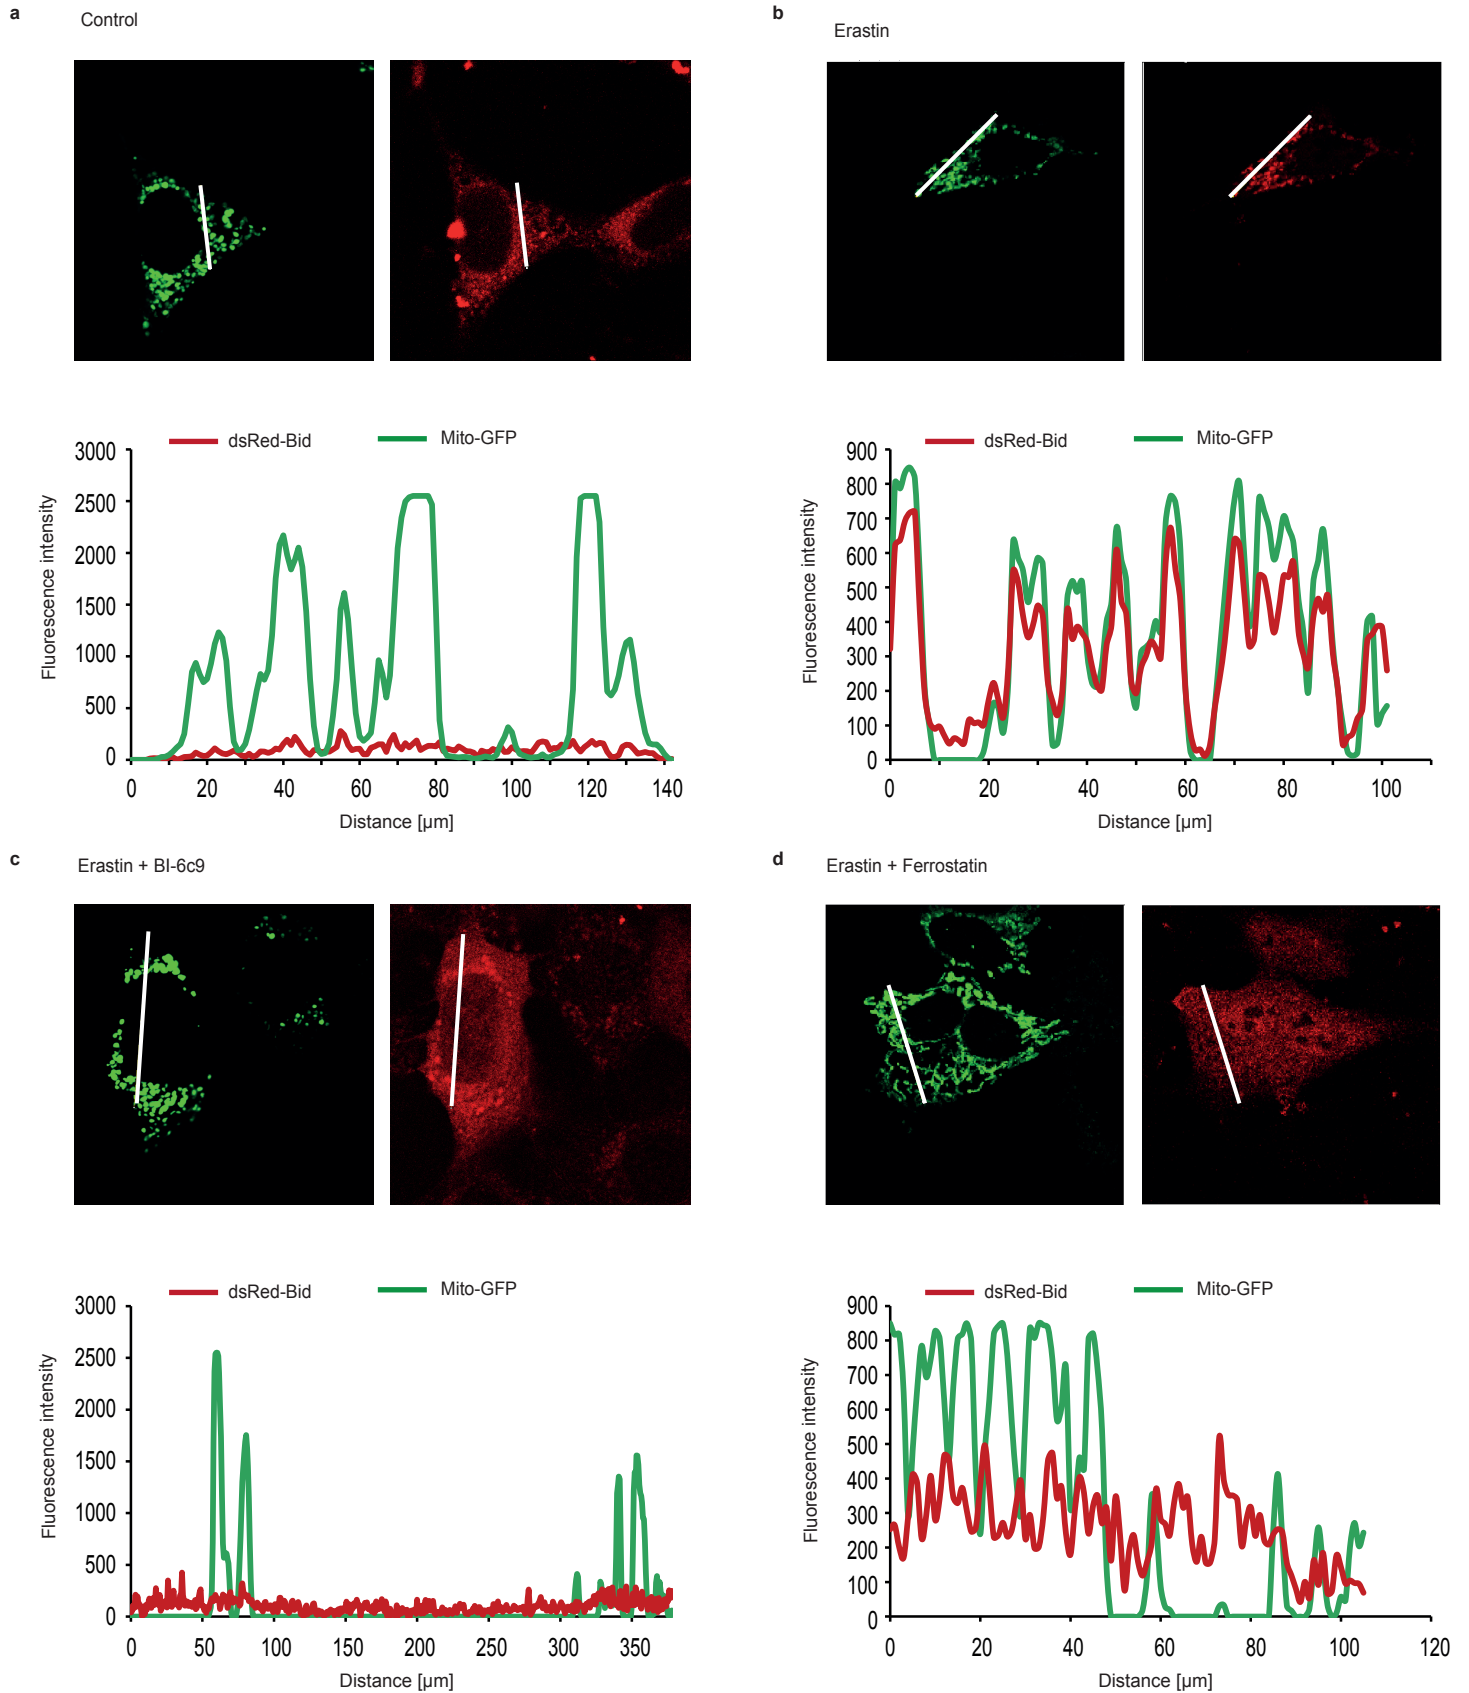

**Supplemental figure 7: Quantification of Bid translocation upon glutamate and erastin exposure.**

HT-22 cells were co-transfected with pDSRed2-Bid (red) and mitochondrial targeted GFP. After 16 h of erastin (1  $\mu$ M) treatment, cells were fixed and localization of Bid was analyzed by confocal microscopy. Analysis of fluorescence intensities ( $n=3$ /treatment condition) by ImageJ software revealed the co-localization of Bid and mitochondria by overlapping of green and red fluorescence after erastin (**b**) treatment with  $r=0.78\pm 0.18$ , which was abolished by co-treatment with BI-6c9 with  $r=0.3\pm 0.17$  (**c**) and ferrostatin-1 with  $r=0.14\pm 0.19$  (**d**), respectively. Under control conditions Bid did not co-localize with mitochondria (**a**),  $r=0.31\pm 0.05$ . Data are given as mean  $\pm$  S.D.

Supplemental figure 8: AIF knockdown prevents oxytosis and ferroptosis

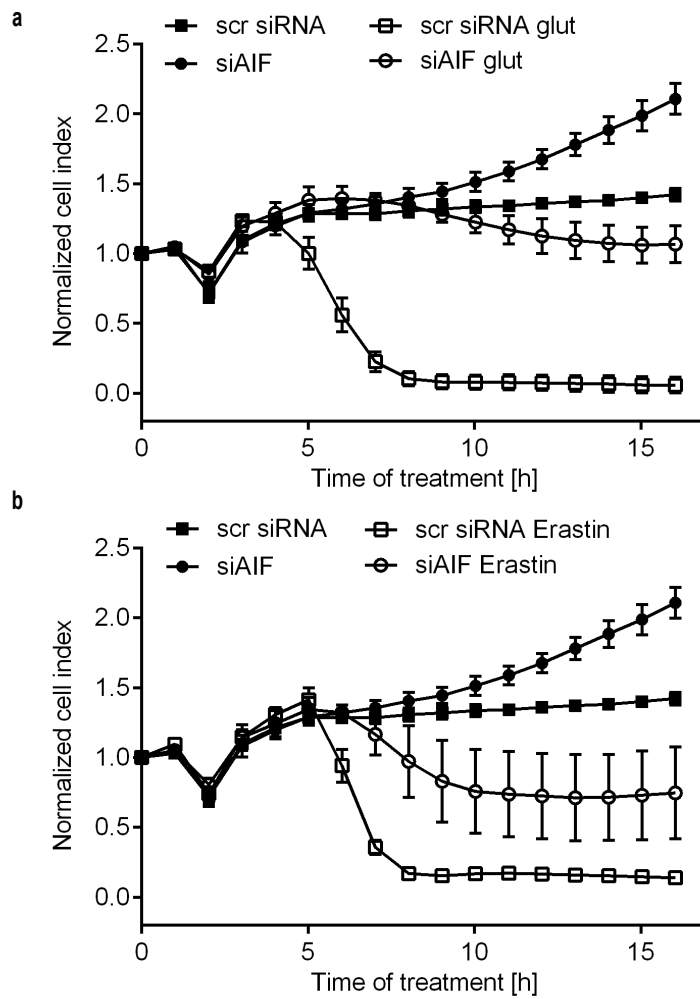

Supplemental figure 8: AIF knockdown prevents oxytosis and ferroptosis

**a, b:** Real-time impedance measurement revealed protection of AIF knockdown (20 nM siAIF, 48 h) against glutamate (5.5  $\mu$ M, a) and erastin (0.5  $\mu$ M, b) toxicity compared to control siRNA (20 nM scr siRNA, 48 h). Data are given as mean  $\pm$  S.D.
